# Supplementary material for: A universal and versatile THz field manipulation mechanism by a Pancharatnam-Berry phase-based dislocation scheme at NIR.
Source: Research Square preprint supplement (doi:10.21203/rs.3.rs-5236817/v1), 2024-10-30
Supplement: Supplementary file 1 [file 7781722f42344fea86f1b4ff.docx]

**Supplementary material:** **A universal and versatile THz field manipulation mechanism by a Pancharatnam-Berry phase-based dislocation scheme at NIR**

**Part I: Diffraction Characteristics of the Used Phase Plates**

The effect size of the phase plates (PB1 and PB2) prepared by liquid crystal polymer used for a two-dimensional phase modulator is 15.36 mm×15.36 mm, with a pixel count of 512 × 512 and a single pixel size of 30 μm×30 μm, corresponding to the constants *a* and *b* in Eq. (6) of the main body to be 3.6 mm and 5.2 mm, respectively. To check the effectiveness of the phase plates, we measure the diffraction images of a linearly polarized light beam passing through the phase plates with the propagation distances of 50 mm, 100 mm, and 200 mm in the experiment (as shown in Fig. S1 (*a*) and S1 (*b*)) and together with corresponding simulation results (as shown in Fig. S1 (*c*)). These results show the diffraction images of the two plates are very similar and well match the simulation results. This result demonstrates that the two plates have been designed and fabricated with consistent modulation functions as predicted.


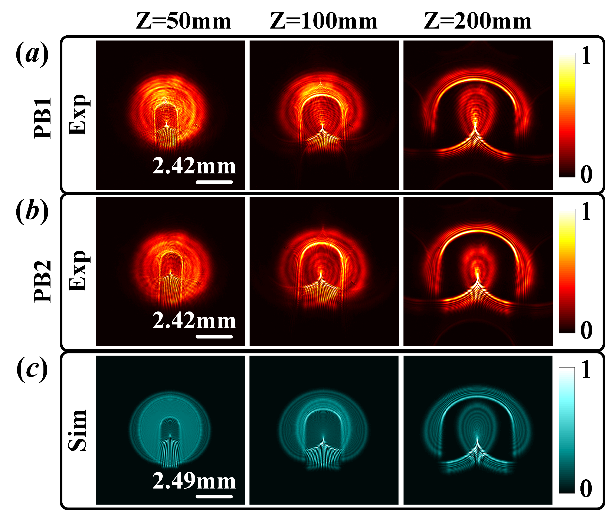


Fig. S1 The measured diffraction images of linearly polarized light passing through phase modulators PB1 (*a*) and PB2 (*b*) at different positions and corresponding simulations (*c*).

**Part II: THz Waveform and Spectral Distribution**

Figures S2 (*a*) and S2 (*b*) show the measured terahertz (THz) time-domain waveform and spectral distribution, with a time window of ~12 ps and a central frequency of 2 THz. The THz waveform performs multiple cycles with a long tail, originates from the chirp of the pump laser, the transverse phonon resonance and water absorption in the crystal, etc. The extracted terahertz spectrum is relative narrower compared with the corresponding by optical rectification due to the pump chirp.


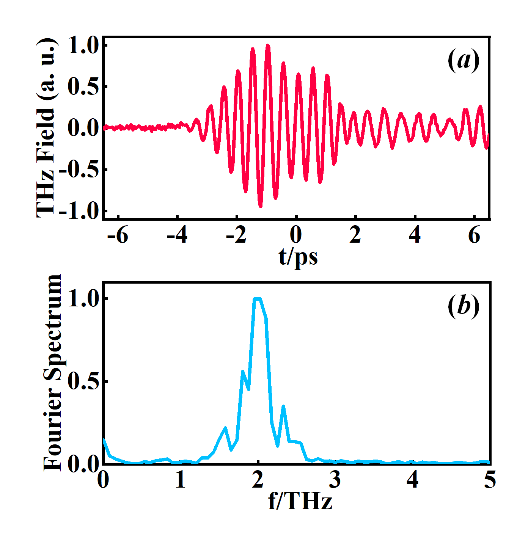


Fig. S2 Temporal waveform (*a*) and corresponding spectrum (*b*) of the THz pulses generated by optical frequency-difference generation.
